# Supplementary material
Source: PubMed Central journal article supplement (PMC11369676)
Supplement: NIHMS2014586-supplement-De_Schacht_et_al__CAG_in_Mozambique_-_supplementary_material.pdf [file NIHMS2014586-supplement-De_Schacht_et_al__CAG_in_Mozambique_-_supplementary_material.pdf]

Community Adherence Support Groups in Mozambique – Supplementary material

**Table S1.** Characteristics of Matched Population, stratified by retention at 6 months (n=22,680)

|                                                          | All<br>(n=22,680) | Not-retained<br>(n=3,413) | Retained<br>(n=19,267) | OR [95% CI] §     | p-value |
|----------------------------------------------------------|-------------------|---------------------------|------------------------|-------------------|---------|
| CASG member                                              |                   |                           |                        |                   |         |
| No                                                       | 11,340 (50.0%)    | 2,650 (77.6%)             | 8,690 (45.1%)          | Ref.              |         |
| Yes                                                      | 11,340 (50.0%)    | 763 (22.4%)               | 10,577 (54.9%)         | 4.23 [3.88; 4.61] | <0.001  |
| Sex                                                      |                   |                           |                        |                   |         |
| Female                                                   | 16,810 (74.1%)    | 2,519 (73.8%)             | 14,291 (74.2%)         | Ref.              |         |
| Male                                                     | 5,870 (25.9%)     | 894 (26.2%)               | 4,976 (25.8%)          | 0.98 [0.90; 1.07] | 0.650   |
| Age at eligibility, years<br>(median, IQR)               | 32.4 [26.3;40.3]  | 31.1 [24.9;38.8]          | 32.6 [26.5;40.5]       | 1.02 [1.01; 1.02] | <0.001  |
| Age at eligibility, years                                |                   |                           |                        |                   |         |
| 15-19 years                                              | 931 (4.1%)        | 235 (6.9%)                | 696 (3.6%)             | Ref.              |         |
| 20-24 years                                              | 3,582 (15.8%)     | 630 (18.5%)               | 2,952 (15.3%)          | 1.58 [1.33; 1.88] | <0.001  |
| 25-49 years                                              | 16,198 (71.4%)    | 2,291 (67.1%)             | 13,907 (72.2%)         | 2.05 [1.75; 2.39] | <0.001  |
| 50+ years                                                | 1,969 (8.7%)      | 257 (7.5%)                | 1,712 (8.9%)           | 2.25 [1.84; 2.74] | <0.001  |
| Marital Status                                           |                   |                           |                        |                   |         |
| Cohabiting with partner                                  | 7,865 (34.7%)     | 1,216 (35.6%)             | 6,649 (34.5%)          | Ref.              | Ref.    |
| Married                                                  | 2,941 (13.0%)     | 415 (12.2%)               | 2,526 (13.1%)          | 1.11 [0.99; 1.26] | 0.08    |
| Separated/divorced/<br>widowed/single                    | 5,101 (22.5%)     | 686 (20.1%)               | 4,415 (22.9%)          | 1.18 [1.06; 1.30] | 0.001   |
| Missing                                                  | 6,773 (29.9%)     | 1,096 (32.1%)             | 5,677 (29.5%)          | 0.95 [0.87; 1.04] | 0.233   |
| Highest educational level<br>attained                    |                   |                           |                        |                   |         |
| None                                                     | 4,624 (20.4%)     | 639 (18.7%)               | 3,985 (20.7%)          | Ref.              | Ref.    |
| Primary school                                           | 10,384 (45.8%)    | 1,554 (45.5%)             | 8,830 (45.8%)          | 0.91 [0.82; 1.01] | 0.066   |
| Post-secondary                                           | 2,367 (10.4%)     | 355 (10.4%)               | 2,012 (10.4%)          | 0.91 [0.79; 1.05] | 0.183   |
| Missing                                                  | 5,305 (23.4%)     | 865 (25.3%)               | 4,440 (23.0%)          | 0.82 [0.74; 0.92] | 0.001   |
| CD4 cell count (cells/mm <sup>3</sup> )<br>(median, IQR) | 372 [229;551]     | 356 [222;544]             | 374 [230;552]          | 1.00 [1.00; 1.00] | 0.124   |
| CD4 cell count (cells/mm <sup>3</sup> )                  |                   |                           |                        |                   |         |
| <200 cells/mm <sup>3</sup>                               | 3,147 (13.9%)     | 475 (13.9%)               | 2,672 (13.9%)          | Ref.              | Ref.    |
| 200-349 cells/mm <sup>3</sup>                            | 4,028 (17.8%)     | 626 (18.3%)               | 3,402 (17.7%)          | 0.97 [0.85; 1.10] | 0.602   |
| 350-499 cells/mm <sup>3</sup>                            | 3,551 (15.7%)     | 479 (14.0%)               | 3,072 (15.9%)          | 1.14 [0.99; 1.31] | 0.061   |
| ≥500 cells/mm <sup>3</sup>                               | 4,758 (21.0%)     | 656 (19.2%)               | 4,102 (21.3%)          | 1.11 [0.98; 1.26] | 0.105   |
| Missing                                                  | 7,196 (31.7%)     | 1,177 (34.5%)             | 6,019 (31.2%)          | 0.91 [0.81; 1.02] | 0.106   |
| Tuberculosis infection<br>status at enrolment            |                   |                           |                        |                   |         |
| No                                                       | 19,590 (86.4%)    | 2,908 (85.2%)             | 16,682 (86.6%)         | Ref.              | Ref.    |
| Yes                                                      | 2,922 (12.9%)     | 455 (13.3%)               | 2,467 (12.8%)          | 0.94 [0.85; 1.05] | 0.304   |
| Missing                                                  | 168 (0.74%)       | 50 (1.46%)                | 118 (0.61%)            | 0.41 [0.30; 0.58] | <0.001  |
| Health facility location                                 |                   |                           |                        |                   |         |
| Peri-urban Quelimane†                                    | 949 (4.18%)       | 111 (3.3%)                | 838 (4.35%)            | Ref.              |         |
| Semi-urban Quelimane‡                                    | 2,668 (11.8%)     | 269 (7.9%)                | 2,399 (12.5%)          | 1.18 [0.93; 1.49] | 0.167   |
| Rural Districts                                          | 19,063 (84.1%)    | 3,033 (88.9%)             | 16,030 (83.2%)         | 0.70 [0.57; 0.85] | <0.001  |

† Peri-urban: urban health facilities in Quelimane District; ‡ semi-urban: peripheral health facilities in Quelimane District.

§Univariate logistic regressions were used to assess the impact of each variable on 6-months retention.

**Abbreviations:** CASG: Community adherence support group; OR: odds ratio; CI: confidence interval.

## Community Adherence Support Groups in Mozambique – Supplementary material

**Table S2.** Characteristics of Matched Population, stratified by retention at 12 months (n=15,604)

|                                                          | All<br>(n=15,604) | Not-retained<br>(n=3,444) | Retained<br>(n=12,160) | OR [95% CI] §     | p-value |
|----------------------------------------------------------|-------------------|---------------------------|------------------------|-------------------|---------|
| CASG member                                              |                   |                           |                        |                   |         |
| No                                                       | 7,802 (50%)       | 2,629 (76.3%)             | 5,173 (42.5%)          | Ref.              |         |
| Yes                                                      | 7,802 (50%)       | 815 (23.7%)               | 6,987 (57.5%)          | 4.36 [4.00; 4.75] | <0.001  |
| Sex                                                      |                   |                           |                        |                   |         |
| Female                                                   | 11,494 (73.7%)    | 2,463 (71.5%)             | 9,031 (74.3%)          | Ref.              |         |
| Male                                                     | 4,110 (26.3%)     | 981 (28.5%)               | 3,129 (25.7%)          | 0.87 [0.80; 0.95] | 0.001   |
| Age at eligibility, years (median, IQR)                  | 32.9 [26.9;40.8]  | 31.9 [26.0;40.2]          | 33.2 [27.3;41.0]       | 1.01 [1.01; 1.01] | <0.001  |
| Age at eligibility, years                                |                   |                           |                        |                   |         |
| 15-19 years                                              | 546 (3.5%)        | 181 (5.3%)                | 365 (3%)               | Ref.              |         |
| 20-24 years                                              | 2,250 (14.4%)     | 560 (16.3%)               | 1,690 (13.9%)          | 1.50 [1.22; 1.83] | <0.001  |
| 25-49 years                                              | 11,313 (72.5%)    | 2,393 (69.5%)             | 8,920 (73.4%)          | 1.85 [1.54; 2.22] | <0.001  |
| 50+ years                                                | 1,495 (9.6%)      | 310 (9%)                  | 1,185 (9.8%)           | 1.90 [1.52; 2.36] | <0.001  |
| Marital Status                                           |                   |                           |                        |                   |         |
| Cohabiting with partner                                  | 5,399 (34.6%)     | 1,195 (34.7%)             | 4,204 (34.6%)          | Ref.              | Ref.    |
| Married                                                  | 1,929 (12.4%)     | 398 (11.6%)               | 1,531 (12.6%)          | 1.09 [0.96; 1.24] | 0.169   |
| Separated/divorced/<br>widowed/single                    | 3,588 (23.0%)     | 758 (22.0%)               | 2,830 (23.3%)          | 1.06 [0.96; 1.18] | 0.257   |
| Missing                                                  | 4,688 (30.0%)     | 1,093 (31.7%)             | 3,595 (29.6%)          | 0.93 [0.85; 1.03] | 0.158   |
| Highest educational level<br>attained                    |                   |                           |                        |                   |         |
| None                                                     | 3,219 (20.6%)     | 685 (19.9%)               | 2,534 (20.8%)          | Ref.              | Ref.    |
| Primary school                                           | 7,092 (45.4%)     | 1,551 (45.0%)             | 5,541 (45.6%)          | 0.97 [0.87; 1.07] | 0.501   |
| Post-secondary                                           | 1,535 (9.84%)     | 323 (9.38%)               | 1,212 (9.97%)          | 1.01 [0.87; 1.18] | 0.853   |
| Missing                                                  | 3,758 (24.1%)     | 885 (25.7%)               | 2,873 (23.6%)          | 0.88 [0.78; 0.98] | 0.024   |
| CD4 cell count (cells/mm <sup>3</sup> )<br>(median, IQR) | 367 [228;543]     | 353 [214;539]             | 370 [232;544]          | 1.00 [1.00; 1.00] | 0.056   |
| CD4 cell count (cells/mm <sup>3</sup> )                  |                   |                           |                        |                   |         |
| <200 cells/mm <sup>3</sup>                               | 2,206 (14.1%)     | 527 (15.3%)               | 1,679 (13.8%)          | Ref.              | Ref.    |
| 200-349 cells/mm <sup>3</sup>                            | 2,844 (18.2%)     | 621 (18.0%)               | 2,223 (18.3%)          | 1.12 [0.98; 1.28] | 0.085   |
| 350-499 cells/mm <sup>3</sup>                            | 2,480 (15.9%)     | 488 (14.2%)               | 1,992 (16.4%)          | 1.28 [1.11; 1.47] | <0.001  |
| ≥500 cells/mm <sup>3</sup>                               | 3,205 (20.5%)     | 676 (19.6%)               | 2,529 (20.8%)          | 1.17 [1.03; 1.34] | 0.015   |
| Missing                                                  | 4,869 (31.2%)     | 1,132 (32.9%)             | 3,737 (30.7%)          | 1.04 [0.92; 1.17] | 0.555   |
| Tuberculosis infection<br>status at enrolment            |                   |                           |                        |                   |         |
| No                                                       | 13,518 (86.6%)    | 2,953 (85.7%)             | 10,565 (86.9%)         | Ref.              | Ref.    |
| Yes                                                      | 1,956 (12.5%)     | 430 (12.5%)               | 1,526 (12.5%)          | 0.99 [0.89; 1.11] | 0.887   |
| Missing                                                  | 130 (0.83%)       | 61 (1.77%)                | 69 (0.57%)             | 0.32 [0.22; 0.45] | <0.001  |
| Health facility location                                 |                   |                           |                        |                   |         |
| Peri-urban Quelimane†                                    | 719 (4.6%)        | 98 (2.9%)                 | 621 (5.1%)             | Ref.              |         |
| Semi-urban Quelimane‡                                    | 1,641 (10.5%)     | 244 (7.1%)                | 1,397 (11.5%)          | 0.90 [0.70; 1.16] | 0.434   |
| Rural Districts                                          | 13,244 (84.9%)    | 3,102 (90.1%)             | 10,142 (83.4%)         | 0.52 [0.41; 0.64] | <0.001  |

†Peri-urban: urban health facilities in Quelimane District; ‡ semi-urban: peripheral health facilities in Quelimane District.

§Univariate logistic regressions were used to assess the impact of each variable on 12-months retention.

**Abbreviations:** CASG: Community adherence support group; OR: odds ratio; CI: confidence interval.

Community Adherence Support Groups in Mozambique – Supplementary material

**Table S3.** Characteristics of Matched Population, stratified by lost-to-follow-up status (n=26,858)

|                                               | All<br>(n=26,858) | Not-LTFU<br>(n=21,701) | LTFU<br>(n=5,157) | HR [95% CI]       | p-value |
|-----------------------------------------------|-------------------|------------------------|-------------------|-------------------|---------|
| CASG member                                   |                   |                        |                   |                   |         |
| No                                            | 13,429 (50.0%)    | 9,513 (43.8%)          | 3,916 (75.9%)     | Ref.              |         |
| Yes                                           | 13,429 (50.0%)    | 12,188 (56.2%)         | 1,241 (24.1%)     | 0.28 [0.26; 0.30] | <0.001  |
| Sex                                           |                   |                        |                   |                   |         |
| Female                                        | 20,020 (74.5%)    | 16,398 (75.6%)         | 3,622 (70.2%)     | Ref.              |         |
| Male                                          | 6,838 (25.5%)     | 5,303 (24.4%)          | 1,535 (29.8%)     | 1.27 [1.20; 1.35] | <0.001  |
| Age at eligibility, years<br>(median, IQR)    | 31.9 [25.9;40.0]  | 32.0 [26.0;40.1]       | 31.5 [25.7;39.6]  | 1.00 [0.99; 1.00] | 0.058   |
| Age at eligibility, years                     |                   |                        |                   |                   |         |
| 15-19 years                                   | 1,223 (4.55%)     | 947 (4.36%)            | 276 (5.35%)       | Ref.              |         |
| 20-24 years                                   | 4,469 (16.6%)     | 3,588 (16.5%)          | 881 (17.1%)       | 0.84 [0.73; 0.96] | 0.009   |
| 25-49 years                                   | 18,908 (70.4%)    | 15,343 (70.7%)         | 3,565 (69.1%)     | 0.78 [0.69; 0.88] | <0.001  |
| 50+ years                                     | 2,258 (8.41%)     | 1,823 (8.40%)          | 435 (8.44%)       | 0.85 [0.73; 0.99] | 0.032   |
| Marital Status                                |                   |                        |                   |                   |         |
| Cohabiting with partner                       | 9,415 (35.1%)     | 7,633 (35.2%)          | 1,782 (34.6%)     | Ref.              | Ref.    |
| Married                                       | 3,516 (13.1%)     | 2,945 (13.6%)          | 571 (11.1%)       | 0.83 [0.75; 0.92] | <0.001  |
| Separated/divorced/<br>widowed/single         | 5,974 (22.2%)     | 4,810 (22.2%)          | 1,164 (22.6%)     | 1.04 [0.95; 1.13] | 0.392   |
| Missing                                       | 7,953 (29.6%)     | 6,313 (29.1%)          | 1,640 (31.8%)     | 1.11 [1.03; 1.20] | 0.005   |
| Highest educational level<br>attained         |                   |                        |                   |                   |         |
| None                                          | 5,397 (20.1%)     | 4,476 (20.6%)          | 921 (17.9%)       | Ref.              | Ref.    |
| Post-secondary                                | 2,937 (10.9%)     | 2,347 (10.8%)          | 590 (11.4%)       | 1.22 [1.09; 1.37] | 0.001   |
| Primary school                                | 12,290 (45.8%)    | 10,049 (46.3%)         | 2,241 (43.5%)     | 1.08 [1.00; 1.18] | 0.061   |
| Missing                                       | 6,234 (23.2%)     | 4,829 (22.3%)          | 1,405 (27.2%)     | 1.41 [1.29; 1.55] | <0.001  |
| CD4 cell count (cells/mm3)<br>(median, IQR)   | 375 [231;555]     | 384 [239;561]          | 337 [199;523]     | 1.00 [1.00; 1.00] | <0.001  |
| CD4 cell count (cells/mm3)                    |                   |                        |                   |                   |         |
| <200 cells/mm3                                | 3,666 (13.6%)     | 2,780 (12.8%)          | 886 (17.2%)       | Ref.              | Ref.    |
| 200-349 cells/mm3                             | 4,715 (17.6%)     | 3,737 (17.2%)          | 978 (19.0%)       | 0.82 [0.74; 0.91] | <0.001  |
| 350-499 cells/mm3                             | 4,156 (15.5%)     | 3,467 (16.0%)          | 689 (13.4%)       | 0.62 [0.56; 0.70] | 0       |
| ≥500 cells/mm3                                | 5,712 (21.3%)     | 4,731 (21.8%)          | 981 (19.0%)       | 0.65 [0.59; 0.72] | <0.001  |
| Missing                                       | 8,609 (32.1%)     | 6,986 (32.2%)          | 1,623 (31.5%)     | 0.73 [0.66; 0.80] | <0.001  |
| Tuberculosis infection<br>status at enrolment |                   |                        |                   |                   |         |
| No                                            | 23,232 (86.5%)    | 18,777 (86.5%)         | 4,455 (86.4%)     | Ref.              |         |
| Yes                                           | 3,440 (12.8%)     | 2,824 (13.0%)          | 616 (11.9%)       | 0.92 [0.84; 1.01] | 0.075   |
| Missing                                       | 186 (0.69%)       | 100 (0.46%)            | 86 (1.67%)        | 3.63 [2.71; 4.84] | <0.001  |
| Health facility location                      |                   |                        |                   |                   |         |
| Peri-urban Quelimane†                         | 1,055 (3.93%)     | 830 (3.82%)            | 225 (4.36%)       | Ref.              |         |
| Semi-urban Quelimane‡                         | 3,262 (12.1%)     | 2,922 (13.5%)          | 340 (6.59%)       | 1.17 [1.02; 1.33] | 0.025   |
| Rural Districts                               | 22,541 (83.9%)    | 17,949 (82.7%)         | 4,592 (89.0%)     | 0.67 [0.56; 0.79] | <0.001  |

†Peri-urban: urban health facilities in Quelimane District; ‡semi-urban: peripheral health facilities in Quelimane District.  
**Abbreviations:** CASG: Community adherence support group; HR: hazard ratio; CI: confidence interval.

Community Adherence Support Groups in Mozambique – Supplementary material

**Table S4.** Characteristics of Matched Population, stratified by viral suppression (n=7,674)

|                                                          | All<br>(n=7,674) | Not virally<br>suppressed<br>(n=1,678) | Virally<br>suppressed<br>(n=5,996) | OR [95% CI] §     | p-value |
|----------------------------------------------------------|------------------|----------------------------------------|------------------------------------|-------------------|---------|
| CASG member                                              |                  |                                        |                                    |                   |         |
| No                                                       | 3,837 (50.0%)    | 895 (53.3%)                            | 2,942 (49.1%)                      | Ref.              |         |
| Yes                                                      | 3,837 (50.0%)    | 783 (46.7%)                            | 3,054 (50.9%)                      | 1.19 [1.06; 1.32] | 0.002   |
| Sex                                                      |                  |                                        |                                    |                   |         |
| Female                                                   | 5,851 (76.2%)    | 1,209 (72.1%)                          | 4,642 (77.4%)                      | Ref.              |         |
| Male                                                     | 1,823 (23.8%)    | 469 (27.9%)                            | 1,354 (22.6%)                      | 0.75 [0.67; 0.85] | <0.001  |
| Age at eligibility, years<br>(median, IQR)               | 32.2 [26.2;40.3] | 31.5 [25.5;39.2]                       | 32.5 [26.4;40.6]                   | 1.01 [1.01; 1.02] | <0.001  |
| Age at eligibility, years                                |                  |                                        |                                    |                   |         |
| 15-19 years                                              | 335 (4.37%)      | 77 (4.59%)                             | 258 (4.30%)                        | Ref.              |         |
| 20-24 years                                              | 1,227 (16.0%)    | 318 (19.0%)                            | 909 (15.2%)                        | 0.85 [0.64; 1.13] | 0.274   |
| 25-49 years                                              | 5,450 (71.0%)    | 1,162 (69.2%)                          | 4,288 (71.5%)                      | 1.10 [0.84; 1.43] | 0.469   |
| 50+ years                                                | 662 (8.63%)      | 121 (7.21%)                            | 541 (9.02%)                        | 1.33 [0.96; 1.84] | 0.081   |
| Marital Status                                           |                  |                                        |                                    |                   |         |
| Cohabiting with<br>partner                               | 2,799 (36.5%)    | 660 (39.3%)                            | 2,139 (35.7%)                      | Ref.              |         |
| Married                                                  | 959 (12.5%)      | 200 (11.9%)                            | 759 (12.7%)                        | 1.17 [0.98; 1.40] | 0.082   |
| Separated/divorced/<br>widowed/single                    | 1,794 (23.4%)    | 381 (22.7%)                            | 1,413 (23.6%)                      | 1.14 [0.99; 1.32] | 0.064   |
| Missing                                                  | 2,122 (27.7%)    | 437 (26.0%)                            | 1,685 (28.1%)                      | 1.19 [1.04; 1.36] | 0.013   |
| Highest educational level<br>attained                    |                  |                                        |                                    |                   |         |
| None                                                     | 1,551 (20.2%)    | 316 (18.8%)                            | 1,235 (20.6%)                      | Ref.              |         |
| Primary school                                           | 883 (11.5%)      | 182 (10.8%)                            | 701 (11.7%)                        | 0.99 [0.80; 1.21] | 0.887   |
| Post-secondary                                           | 3,577 (46.6%)    | 868 (51.7%)                            | 2,709 (45.2%)                      | 0.80 [0.69; 0.92] | 0.002   |
| Missing                                                  | 1,663 (21.7%)    | 312 (18.6%)                            | 1,351 (22.5%)                      | 1.11 [0.93; 1.32] | 0.25    |
| CD4 cell count (cells/mm <sup>3</sup> )<br>(median, IQR) | 385 [236;565]    | 355 [209;526]                          | 395 [246;577]                      | 1.00 [1.00; 1.00] | <0.001  |
| CD4 cell count (cells/mm <sup>3</sup> )                  |                  |                                        |                                    |                   |         |
| <200 cells/mm <sup>3</sup>                               | 1,032 (13.4%)    | 272 (16.2%)                            | 760 (12.7%)                        | Ref.              |         |
| 200-349 cells/mm <sup>3</sup>                            | 1,332 (17.4%)    | 311 (18.5%)                            | 1,021 (17.0%)                      | 1.17 [0.97; 1.42] | 0.093   |
| 350-499 cells/mm <sup>3</sup>                            | 1,246 (16.2%)    | 264 (15.7%)                            | 982 (16.4%)                        | 1.33 [1.10; 1.62] | 0.004   |
| ≥500 cells/mm <sup>3</sup>                               | 1,761 (22.9%)    | 331 (19.7%)                            | 1,430 (23.8%)                      | 1.55 [1.29; 1.86] | <0.001  |
| Missing                                                  | 2,303 (30.0%)    | 500 (29.8%)                            | 1,803 (30.1%)                      | 1.29 [1.09; 1.53] | 0.004   |
| Tuberculosis infection<br>status at enrolment            |                  |                                        |                                    |                   |         |
| No                                                       | 6,660 (86.8%)    | 1,456 (86.8%)                          | 5,204 (86.8%)                      | Ref.              | Ref.    |
| Yes                                                      | 974 (12.7%)      | 210 (12.5%)                            | 764 (12.7%)                        | 1.02 [0.87; 1.20] | 0.836   |
| Missing                                                  | 40 (0.52%)       | 12 (0.72%)                             | 28 (0.47%)                         | 0.65 [0.34; 1.33] | 0.228   |
| Health facility location                                 |                  |                                        |                                    |                   |         |
| Peri-urban Quelimane†                                    | 470 (6.12%)      | 73 (4.35%)                             | 397 (6.62%)                        | Ref.              |         |
| Semi-urban Quelimane‡                                    | 778 (10.1%)      | 121 (7.21%)                            | 657 (11.0%)                        | 1.00 [0.73; 1.37] | 0.996   |
| Rural Districts                                          | 6,426 (83.7%)    | 1,484 (88.4%)                          | 4,942 (82.4%)                      | 0.61 [0.47; 0.79] | <0.001  |

† Peri-urban: urban health facilities in Quelimane District; ‡ semi-urban: peripheral health facilities in Quelimane District.

§ Univariate logistic regressions were used to assess the impact of each variable on viral suppression.

**Abbreviations:** CASG: Community adherence support group; OR: odds ratio; CI: confidence interval.

## Community Adherence Support Groups in Mozambique – Supplementary material

**Table S5.** Multivariable cox regression to assess whether non-CASG members were associated with higher hazards of being LTFU, while adjusting for sex, age at baseline, educational level, marital status, CD4 count at baseline, and district.

|                                         | <b>LTFU<br/>HR [95% CI]<br/>(n=26,858)</b> |
|-----------------------------------------|--------------------------------------------|
| CASG member: No                         | 3.45 [3.20; 4.73]                          |
| Sex: Male                               | 1.35 [1.26; 1.44]                          |
| Age at eligibility                      |                                            |
| 25 years                                | 1.09 [1.04; 1.14]                          |
| 35 years                                | Ref                                        |
| 50 years                                | 1.06 [0.99; 1.13]                          |
| Highest educational level attained      |                                            |
| None                                    | 1.02 [0.95; 1.10]                          |
| Primary                                 | Ref                                        |
| Post-Secondary                          | 1.02 [0.93; 1.11]                          |
| Marital status                          |                                            |
| Living with partner                     | Ref                                        |
| Married                                 | 1.01 [0.92; 1.10]                          |
| Separated/Divorced/Widowed/Single       | 1.12 [1.04; 1.20]                          |
| CD4 cell count (cells/mm <sup>3</sup> ) |                                            |
| 150 cells/mm <sup>3</sup>               | 0.99 [0.88; 1.11]                          |
| 300 cells/mm <sup>3</sup>               | Ref                                        |
| 500 cells/mm <sup>3</sup>               | 1.03 [0.96; 1.10]                          |
| District                                |                                            |
| Quelimane                               | Ref                                        |
| Gilé                                    | 0.71 [0.58; 0.86]                          |
| Ile                                     | 1.05 [0.90; 1.22]                          |
| Inhassunge                              | 1.43 [1.24; 1.65]                          |
| Maganja da Costa                        | 3.27 [2.88; 3.72]                          |
| Mocubela                                | 0.62 [0.51; 0.75]                          |
| Alto Molócuè                            | 0.84 [0.74; 0.97]                          |
| Namacurra                               | 0.90 [0.79; 1.02]                          |
| Pebane                                  | 0.65 [0.57; 0.75]                          |

**Note:** Age and CD4 were fitted using restricted cubic splines. Reference levels for the variable *CASG member* is *yes* and for *sex* is *female*. Values are described in terms of point estimates and the corresponding 95% confidence intervals, obtained after a multivariable logistic regression model. **Abbreviations:** LTFU: Loss to follow-up; CASG: Community adherence support group; HR: Hazard ratio; CI: confidence interval.

Supplemental Figures

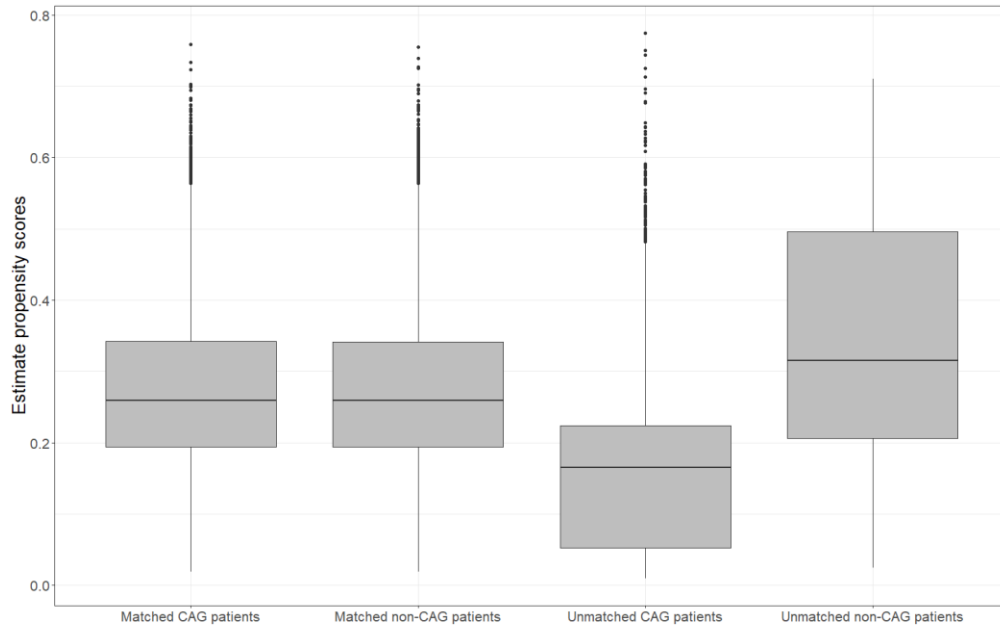

**Figure S1.** Distribution of estimated propensity scores across all four groups: matched CAG patients, matched non-CAG patients, unmatched CAG patients, and unmatched non-CAG patients, respectively.

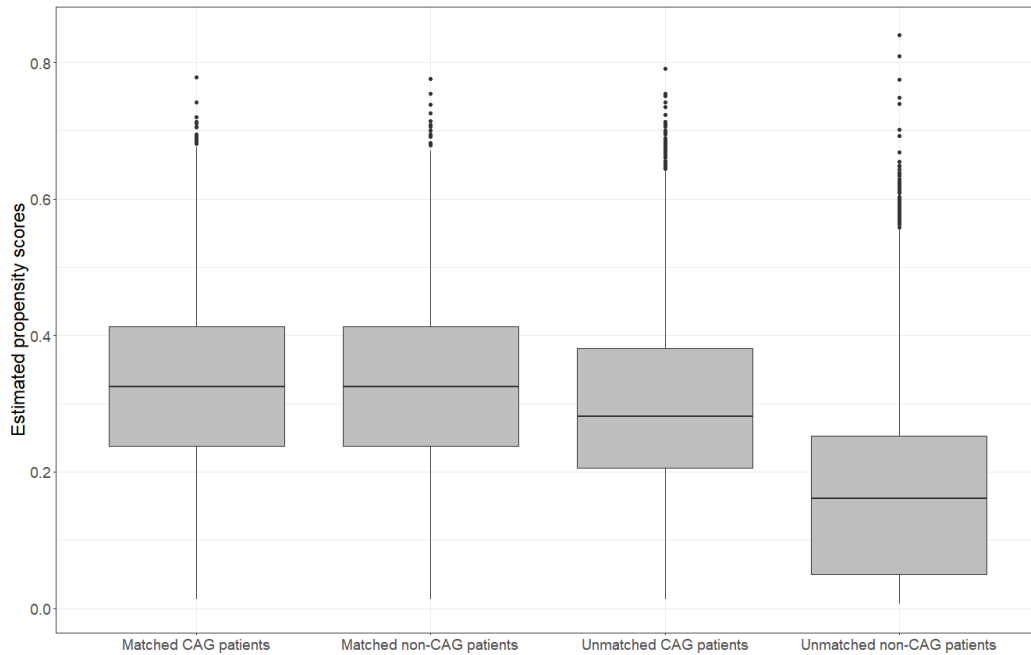

**Figure S2.** Distribution of estimated propensity scores across all four groups, among patients with viral load results: matched CAG patients, matched non-CAG patients, unmatched CAG patients, and unmatched non-CAG patients, respectively.
